# Supplementary material for: 2,6-Diaryl-9,10-anthraquinones as models for electron-accepting polymers
Source: Royal Society of Chemistry journal article supplement (doi:10.1039/b701257h), 2007-01-01
Supplement: b701257h.pdf [file b701257h.pdf]

# 2,6-Diaryl-9,10-anthraquinones as Models for Electron- Accepting Polymers

*Julien E. Gautrot,<sup>\*a</sup> Philip Hodge,<sup>\*a</sup> Domenico Cupertino<sup>b</sup> and Madeleine Helliwell<sup>a</sup>*

<sup>a</sup> Department of Chemistry, University of Manchester, Oxford Road, Manchester, M13 9PL, UK

<sup>b</sup> Avecia, Blackley, Manchester, UK

E-mail: juliengautrot@yahoo.fr; Philip.Hodge@man.ac.uk

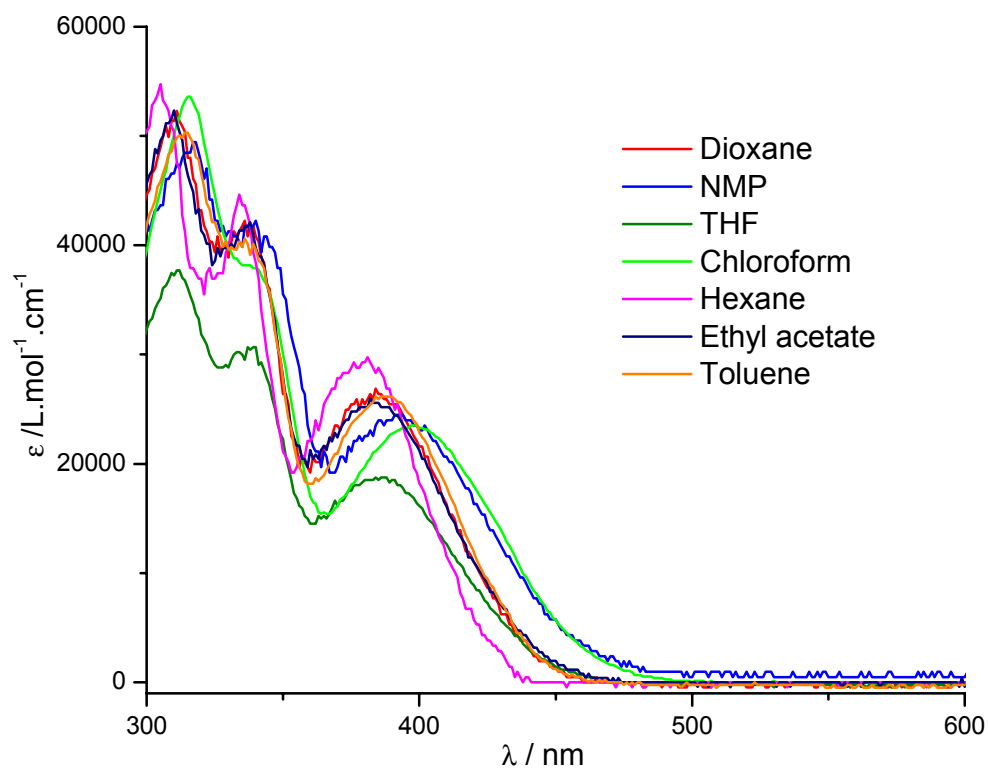

**Fig. S1** UV-vis spectra of compound **3c** in various solvents

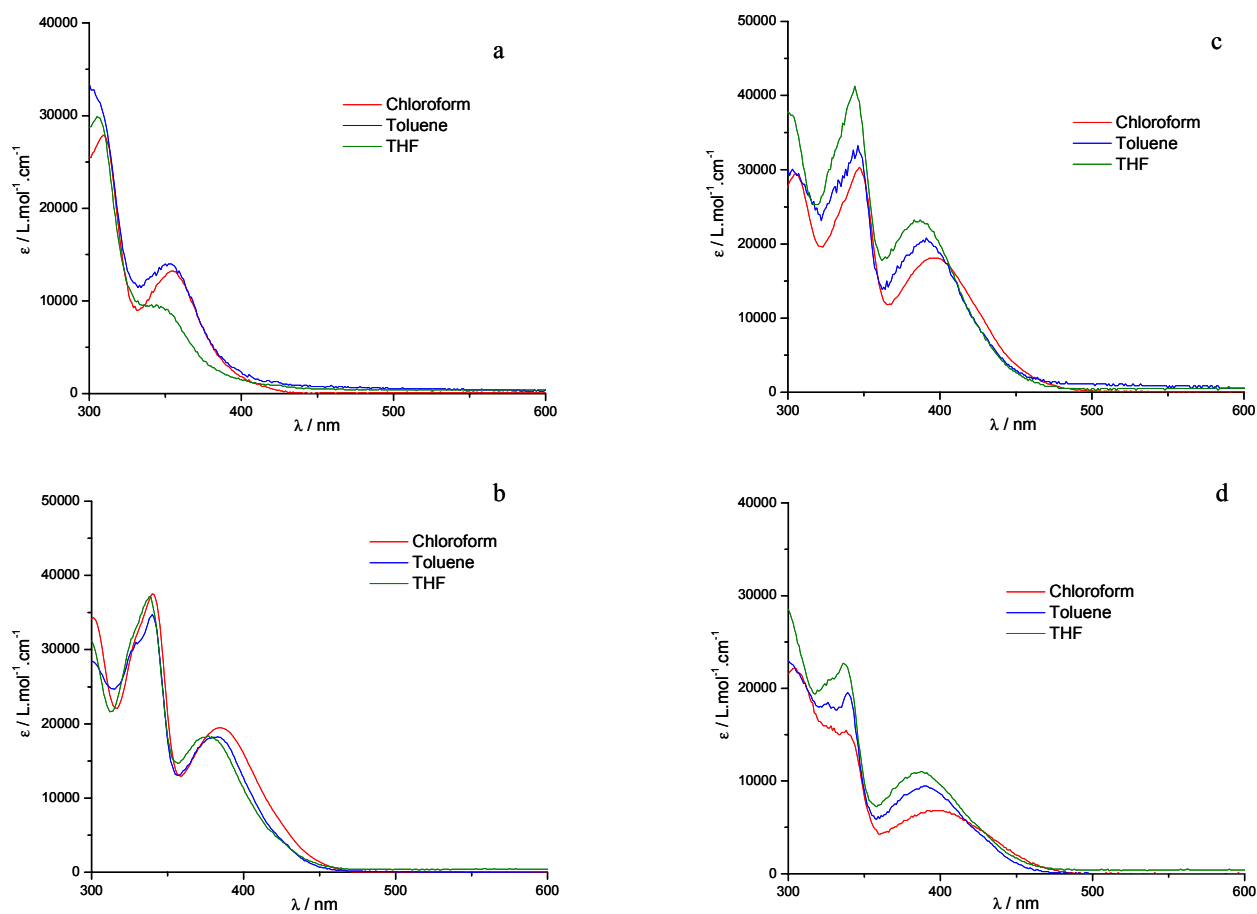

**Fig. S2** UV-vis spectra of 2,6-diaryl-9,10-anthraquinones in THF, toluene and chloroform; a, compound **3a**; b, compound **3b**; c, compound **3d**; d, compound **3e**.

# Supplementary Material (ESI) for New Journal of Chemistry  
# This journal is (c) The Royal Society of Chemistry and  
# The Centre National de la Recherche Scientifique, 2007

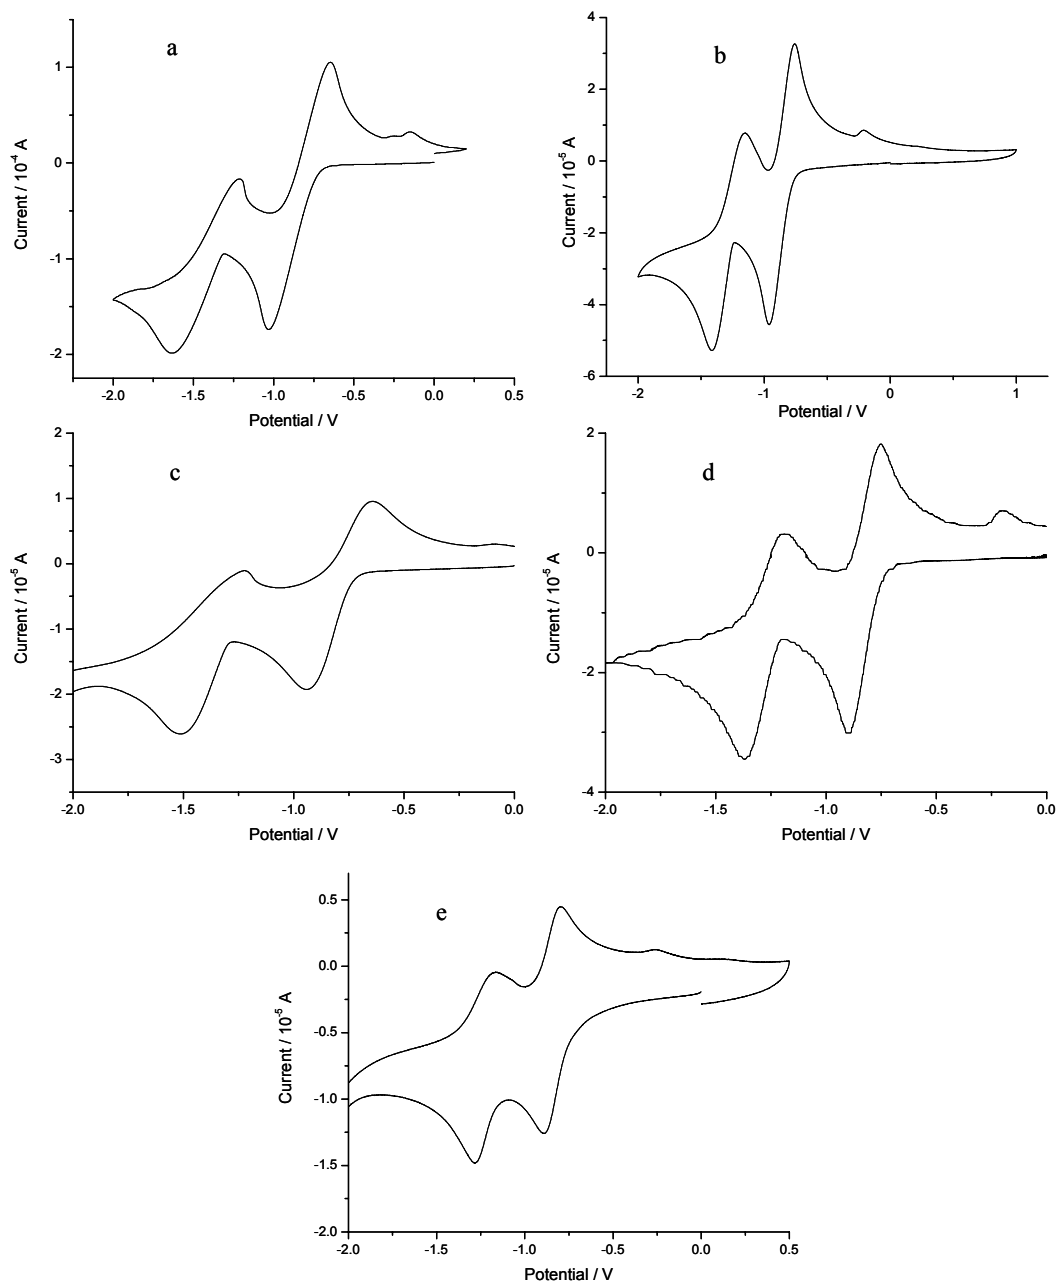

**Fig. S3** CV traces of 9,10-anthraquinone **1** (a) and compounds **3a** (b), **3c** (c), **3d** (d) and **3e** (e) (3 mmol.L<sup>-1</sup>) in TBAPF<sub>6</sub> (0.1 mol.L<sup>-1</sup>) solution in degassed anhydrous DCM (scan rate: 0.1 V.s<sup>-1</sup>), vs Ag/AgCl.
